# Supplementary material
Source: PubMed Central journal article supplement (PMC5750137)
Supplement: NIHMS930233-supplement-SI.pdf [file NIHMS930233-supplement-SI.pdf]

Supporting information

Development of a thermostable microneedle patch for influenza vaccination

Matthew Mistilis, Andreas S Bommaricus and Mark R. Prausnitz

Figure S1. Flowchart of microneedle patch fabrication process.

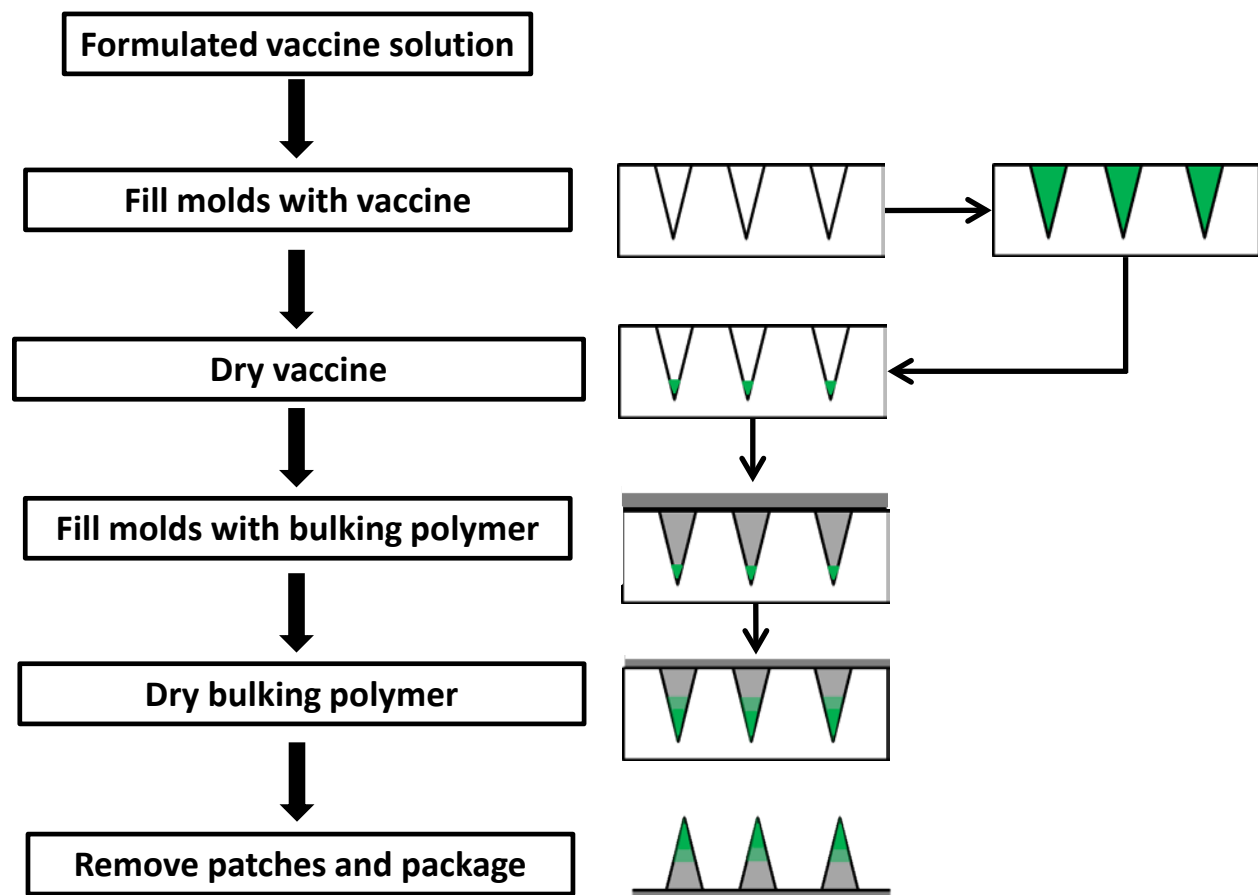

TABLE S1. Surfactants and their critical micelle concentrations from Figure 2.<sup>1</sup>

| <b>Surfactant</b>                                                 | <b>critical micelle concentration (mM)</b> |
|-------------------------------------------------------------------|--------------------------------------------|
| Lutrol F68                                                        | 0.04                                       |
| Tween 20                                                          | 0.06                                       |
| SDS (sodium dodecyl sulfate)                                      | 8                                          |
| CTAB (cetrimonium bromide)                                        | 1                                          |
| CHAPS (3-[(3-cholamidopropyl)dimethylammonio]-1-propanesulfonate) | 6                                          |

TABLE S2. Key to vaccine formulation excipients found in Figure 3.

| Formulation # | Stabilizer                             | Activity remaining | Formulation # | Stabilizer            | Activity remaining |
|---------------|----------------------------------------|--------------------|---------------|-----------------------|--------------------|
| 1             | maltodextrin 4                         | 98%                | 32            | lysine                | 40%                |
| 2             | arginine                               | 91%                | 33            | sodium phosphate      | 40%                |
| 3             | trehalose                              | 89%                | 34            | valine                | 40%                |
| 4             | maltose                                | 87%                | 35            | threonine             | 39%                |
| 5             | histidine                              | 85%                | 36            | galactose             | 39%                |
| 6             | calcium heptagluconate                 | 85%                | 37            | alanine               | 37%                |
| 7             | maltodextrin 13                        | 85%                | 38            | methionine            | 37%                |
| 8             | sucrose                                | 82%                | 39            | proline               | 35%                |
| 9             | glucose                                | 82%                | 40            | mannitol              | 34%                |
| 10            | heparin                                | 81%                | 41            | human serum albumin 2 | 34%                |
| 11            | raffinose                              | 80%                | 42            | glutamine             | 34%                |
| 12            | myo-inositol                           | 77%                | 43            | human serum albumin 1 | 32%                |
| 13            | lactose                                | 77%                | 44            | tryptophan            | 32%                |
| 14            | sorbitol                               | 76%                | 45            | tyrosine              | 32%                |
| 15            | arabitol                               | 75%                | 46            | serine                | 31%                |
| 16            | fructose                               | 72%                | 47            | bovine serum albumin  | 31%                |
| 17            | $\gamma$ -cyclodextrin                 | 70%                | 48            | creatine              | 30%                |
| 18            | potassium gluconate                    | 62%                | 49            | leucine               | 30%                |
| 19            | adonitol                               | 60%                | 50            | potassium sulfate     | 29%                |
| 20            | xylitol                                | 58%                | 51            | sodium succinate      | 29%                |
| 21            | sodium thiosulfate                     | 57%                | 52            | isoleucine            | 29%                |
| 22            | asparagine                             | 55%                | 53            | ethyl lactate         | 24%                |
| 23            | 2-hydroxypropyl- $\beta$ -cyclodextrin | 55%                | 54            | phenylalanine         | 23%                |
| 24            | Tris                                   | 54%                | 55            | arabinose             | 21%                |
| 25            | sodium citrate                         | 53%                | 56            | potassium phosphate   | 16%                |
| 26            | dulcitol                               | 53%                | 57            | xylose                | 14%                |
| 27            | potassium citrate                      | 50%                | 58            | potassium sulfite     | 9%                 |
| 28            | ovalbumin                              | 47%                | 59            | cysteine              | 8%                 |
| 29            | glycine                                | 47%                | 60            | glycerol              | 4%                 |
| 30            | methyl glucoside                       | 43%                | 61            | sodium thioglycolate  | 4%                 |
| 31            | $\beta$ -cyclodextrin                  | 42%                |               |                       |                    |

TABLE S3. Key to vaccine formulation excipients found in Figure 4.

| Formulation # | Stabilizer 1       | Stabilizer 2       |
|---------------|--------------------|--------------------|
| 1             | maltodextrin       | lactose            |
| 2             | maltodextrin       | sodium thiosulfate |
| 3             | maltodextrin       | trehalose          |
| 4             | maltodextrin       | sodium citrate     |
| 5             | maltodextrin       | sorbitol           |
| 6             | maltodextrin       | arginine           |
| 7             | arginine           | lactose            |
| 8             | arginine           | sodium thiosulfate |
| 9             | arginine           | trehalose          |
| 10            | arginine           | sodium citrate     |
| 11            | arginine           | sorbitol           |
| 12            | sorbitol           | lactose            |
| 13            | sorbitol           | sodium thiosulfate |
| 14            | sorbitol           | trehalose          |
| 15            | sorbitol           | sodium citrate     |
| 16            | sodium             | lactose            |
| 17            | sodium             | sodium thiosulfate |
| 18            | sodium             | trehalose          |
| 19            | trehalose          | lactose            |
| 20            | trehalose          | sodium thiosulfate |
| 21            | sodium thiosulfate | lactose            |

### **Reference**

1. Caligur V 2008 Detergent properties and applications. BioFiles 3:14.
